# Low Serum Urate Levels Are Associated to Female Gender in Multiple Sclerosis Patients

Stefano Zoccolella, Carla Tortorella, Pietro Iaffaldano, Vita Dizenzo, Mariangela D'Onghia, Elena Luciannatelli, Damiano Paolicelli, Paolo Livrea, Maria Trojano\*

Department of Neurosciences and Organs of Senses of the University of Bari, Bari, Italy

## Abstract

**Background:** Urate is a natural antioxidant and may prevent CNS tissue damage and the clinical manifestations of experimental autoimmune encephalitis. Results from clinical studies are conflicting and the contribution of urate to the pathogenesis of Multiple Sclerosis (MS) remains uncertain.

**Objective:** To evaluate serum urate levels in MS patients and their relationships with clinical, demographic and MRI variables.

**Methods:** Levels of non-fasting serum uric acid and creatinine were determined by an automated enzymatic assay and glomerular filtration rate was assessed in 245 MS patients, in 252 age/sex-matched neurological controls (NC) and in 59 Healthy controls (HC).

**Results:** Median serum urate levels did not differ between MS patients (3.8 mg/dL), HC (4.0 mg/dL) and NC (4.0 mg/dL). Serum urate levels were lower in females than in males in all groups ( $p < 0.0001$ ). In female-MS, serum urate levels (3.2 mg/dL) were lower compared to those in female HC (3.8;  $p = 0.01$ ) and NC (3.5 mg/dL;  $p = 0.02$ ), whereas in male-MS they (4.8 mg/dL) did not differ from those in male HC (4.5 mg/dL) and NC (4.8 mg/dL). Urate concentrations trended to be lower in Clinically isolated syndromes suggestive of MS (3.7 mg/dL) and in relapsing MS (3.7 mg/dL), compared to patients with progressive MS (4.4 mg/dL;  $p = 0.06$ ), and in patients with an annual relapse rate (ARR)  $> 2$  (3.3 mg/dL) than in those with an ARR  $\leq 2$  (3.9 mg/dL;  $p = 0.05$ ). Significant lower serum urate levels were found in females than in males in all clinical MS subtypes ( $p < 0.01$ ), separately evaluated. Female sex (beta:  $-0.53$ ;  $p < 0.00001$ ) was the most significant determinant of serum urate concentrations in MS patients on multivariate regression analysis.

**Conclusions:** Our findings suggest that low urate levels could be of significance in predominantly inflammatory phases of MS even at the early stage and mainly in females.

**Citation:** Zoccolella S, Tortorella C, Iaffaldano P, Dizenzo V, D'Onghia M, et al. (2012) Low Serum Urate Levels Are Associated to Female Gender in Multiple Sclerosis Patients. PLoS ONE 7(7): e40608. doi:10.1371/journal.pone.0040608

**Editor:** Markus Reindl, Innsbruck Medical University, Austria

**Received:** February 23, 2012; **Accepted:** June 11, 2012; **Published:** July 27, 2012

**Copyright:** © 2012 Zoccolella et al. This is an open-access article distributed under the terms of the Creative Commons Attribution License, which permits unrestricted use, distribution, and reproduction in any medium, provided the original author and source are credited.

**Funding:** These authors have no support or funding to report.

**Competing Interests:** Dr Tortorella has received honoraria for speaking from Biogen, Sanofi-Aventis, and Novartis. Dr Paolicelli reports a research Grant from Serono Foundation and received speaking honoraria from Biogen Idec and Novartis. Prof Maria Trojano received honoraria for consultancy or speaking from Biogen, Sanofi-Aventis, Merck Serono and Bayer-Schering and research grants from Merck Serono, Biogen and Novartis. We confirm that none of the above research grants were used for this particular study. This does not alter the authors' adherence to all the PLoS ONE policies on sharing data and materials.

\* E-mail: mtrojano@neurol.uniba.it

## Introduction

Multiple Sclerosis (MS) is a neurologic disease of unknown aetiology characterized by inflammation, demyelination and diffuse axonal degeneration throughout the central nervous system. [1]

Uric acid is the main end-product of purine metabolism and circulates in humans at high concentrations, near the limits of its solubility. [2,3] In vitro and in vivo studies showed that urate may protect neurons against oxidative damage caused by reactive nitrogen and oxygen species, particularly by peroxynitrite. [4,5] Peroxynitrite along with other free radicals are believed to be involved in the inflammation, demyelination and axonal injury that occur in MS. [5–7] Furthermore, epidemiological studies conducted in US on more than 20 million patient records revealed

that MS and gout are almost mutually exclusive. [8] All these observations raised the possibility that hyperuricemia may play a protective role against MS.

In the last ten years several studies evaluated serum urate levels in patients with MS, reporting conflicting results; [8–27] some case-control studies found lower, [8–15] but others reported higher [16–18] serum urate levels in MS patients than in neurological [16,19,20] and healthy controls [10,16–19]; finally, other studies found no difference between the MS and neurological, [21,22] and healthy controls. [23–27] A recent meta-analysis was in favour of lower serum urate levels in MS than in healthy subjects and neurological controls [28] Furthermore, in a recent clinical trial, the combination of interferon beta and inosine was safe and well tolerated but did not provide any additional benefit on accumulation of disability compared with interferon beta alone.

[29] Based on these observations, the effective contribute of urate to the pathogenesis of MS still remains unclear.

In this cross-sectional study we evaluated non-fasting serum levels of uric acid and glomerular filtration rate in MS patients and in age and sex matched healthy (HC) and neurological controls (NC). Potential associations between urate levels and demographic, clinical, laboratory and magnetic resonance imaging (MRI) variables were also assessed in MS group.

## Methods

### Study Population

We enrolled all consecutive patients with a diagnosis of Clinically Isolated Syndromes (CIS) suggestive of MS, or of MS, according to the revised Mc Donald's criteria of 2005, [30] and 2010 [31], referring for their first visit to the neurology clinics of the Department of Neuroscience and Sense Organs of the University of Bari, Italy, between January 1, 2007 and July 30, 2010. The population consisted of 58 CIS, 148 relapsing remitting (RR), 30 secondary progressive (SP) and 9 primary progressive (PP) MS. None of patients received corticosteroid treatment in the previous two months and only seven percent of them assumed immunomodulatory therapy.

NC (n = 252) and HC (n = 59) were matched by sex and age with the MS patients. HC were healthy volunteers, whereas NC were recruited during the same time period among patients who were admitted to the same neurological clinics for symptoms as vertigo, dizziness, syncope, radicular or non radicular pain, or minor head trauma. After a complete neurological assessment and central and peripheral diagnostic tests, all patients were classified as having labyrinthitis (n = 64), neurosis (n = 92), radiculopathy (n = 27), vasovagal syncope (n = 37) and minor head trauma (n = 32).

All subjects gave their written informed consent to the study, which was approved by the institutional review board of the University of Bari.

We excluded subjects with a medical history of comorbidities (stroke, myocardial infarction, renal or hepatic dysfunctions, dementia, Parkinson disease and other neurodegenerative disorders), and patients with acute medical conditions (infections and surgical interventions) and alcohol abuse, in the previous three months. [31] Finally, subjects who assumed medications that can either increase (as ascorbic acid, cisplatin, diazoxide, diuretics, epinephrine, ethambutol, levodopa, methylodopa, phenothiazines, and theophylline) or decrease (as high-dose aspirin, azathioprine, clofibrate, corticosteroids, estrogens, glucose infusion, guaifenesin, mannitol, probenecid, and warfarin) urate concentrations were excluded from the study. [32] Based on these criteria, we excluded 10 patients: 3 for vascular disease, 1 for renal dysfunction, 2 for recent surgical interventions, 4 because were receiving medications that can interfere with urate acid levels.

MS patients, NC and HC were caucasian in origin and resident in the same geographic area. No subject was vegetarian.

Levels of non-fasting serum uric acid and creatinine were determined using an automated enzymatic assay. Kidney function was evaluated using an estimate of the glomerular filtration rate, based on the formula proposed by Levey et al, which incorporates serum creatinine, age, sex and race. [33]

Disability status was assessed using the Expanded Disability Status Scale (EDSS) score. [34] Annualised relapse rate (ARR) from disease onset was calculated for each patient. Paraclinical disease activity was investigated in the patients by brain and spinal cord gadolinium (Gd)-MRI scans within 30 days from blood sample collection. Gd-MRI coeval to serum samples was available

in 228 of 245 MS patients (93%). MS patients were considered to have MRI disease activity when they had one or more Gd-enhancing lesions.

### Statistical Analysis

A natural log transformation of the parametric data was carried out to better meet the assumption of normality, because urate levels were not normally distributed. Student's t-test and analysis of variance (ANOVA) were used for parametric data, and chi-square and Fisher's test were used to analyze non-parametric data. Post-Hoc analysis with Bonferroni's test were performed for multiple comparison of Urate levels in MS (either overall and classified according to clinical phenotype), HC and NC stratified by gender.

We studied the association between MS/NC status and urate levels in several logistic regression models, using serum urate levels as both a continuous and a categorical covariate in the model. When urate levels were considered as a categorical variable, we stratified their distribution into tertiles, using the bottom tertile as the reference group. Because of the different distribution of urate levels across gender we also calculated sex-specific tertiles. In the multivariate analyses, data were adjusted for age, sex, and glomerular filtration rate.

Simple and multivariate linear regressions were used to study the association between urate levels and glomerular filtration rate, age, sex, disease phenotype (CIS, RR, SP,PP), disease duration, ARR, EDSS score and MRI disease activity, in MS patients. In all statistical analyses, the level of statistical significance was set at  $p = 0.05$ . All statistical analyses were performed with SPSS version 16.0 for Windows (SPSS Inc., Chicago, IL, USA).

## Results

The study was carried out on 245 MS patients (94 males, 151 females), 252 NC (99 males and 153 females) and 59 HC (21 males, 38 females). In MS group, median disease duration was 25.3 months (range: 0.4–406.1), median EDSS score was 2.5 (1–8). Median ARR in patients with RR and SP MS was 0.7 (0.06–5.7). Seventy-eight patients (34%) showed at least one MRI Gd enhancing lesion. Thirty-one percent (77) was in a relapsing phase.

No significant differences were found in median age (MS: 37 years; range: 15–74; NC: 37 years; range: 14–76; HC: 35 years; range: 15–74;  $p = 0.6$ ) and sex ( $p = 0.4$ ) distribution and in median glomerular filtration rate (108 versus 103 and 102 ml/min/1.73 m<sup>2</sup>) between the three groups. Mean and median serum urate levels did not significantly differ between MS patients ( $3.9 \pm 1.3$  and 3.8 mg/dL), NC ( $4.1 \pm 1.3$  and 4.0 respectively) and HC ( $4.0 \pm 1.2$  and 4.0 mg/dl). Multivariate logistic analyses showed that, even if higher urate levels were less likely associated with MS (age, sex and kidney function adjusted odds ratio [OR] for the MS diagnosis: 0.7; 95% CI: 0.4–1.4), this finding was not statistically significant ( $p = 0.26$ ); similar results were obtained considering urate levels as a categorical variable (age, sex, and kidney function adjusted OR for MS diagnosis for the highest [ $>4.4$  mg/dl] versus the lowest tertile of urate levels [ $\leq 3.3$ ]): 0.7 :95% CI: 0.4–1.2;  $p$  for trend: 0.18).

After stratification of MS, NC and HC groups by gender (Figure 1 A), serum urate levels were lower in females than in males in all groups ( $p < 0.0001$ ). However in female MS, serum urate levels (3.2 mg/dL) were lower compared to those in female HC (3.8 mg/dL; Bonferroni's test: 0.01) and NC (3.5 mg/dL; Bonferroni's test: 0.02), whereas in male MS (4.8 mg/dL) they did not differ from those in male HC (4.5 mg/dl) and NC (4.8 mg/dL). (Figure 1 A) Glomerular filtration rate was similar across

genders either in MS or in HC and NC groups. To rule out the possible confounding effects of the outliers, we also performed a sensitivity analysis excluding subjects with the lowest urate concentrations (<2 mg/dL). The analysis confirmed lower median urate levels in female MS patients (n = 149; 3.2 mg/dL, range: 2–6.5; p = 0.003), compared to female HC (n = 38; 3.8 mg/dL; range: 2.7–6.3; Bonferroni’s test: 0.02) and NC (n = 150; 3.6 mg/dL; range 2–7.3; Bonferroni’s test: p = 0.01).

Logistic regression models revealed that low urate levels trended to be associated with female MS. The age, sex, and kidney function adjusted OR for female MS for the highest [ $>3.8$  mg/dL] versus the lowest tertile [ $\leq 3$  mg/dL] of serum urate levels was 0.4 (95% CI: 0.2–0.7; p for trend: 0.002).

We also evaluated serum urate levels in MS patients, stratifying MS according to clinical phenotypes. Urate concentrations in CIS patients (3.7 mg/dL, range: 1.7–6.5) and in RR MS (3.7 mg/dL, range: 0.6–9.8) were lower compared to patients with progressive MS (4.4 mg/dL, range: 2.2–7.9; p = 0.05). However, the difference was not significant when compared to HC (4.0 mg/dL) and NC (4.0 mg/dL). Stratifying MS subtypes by gender, (Figure 1 B) the difference in serum urate concentrations between males and females was found in all clinical subtypes (CIS females: 3.5 mg/dL, range: 1.7–6.5, CIS males: 4.5 mg/dL, range: 2.7–6.1; p<0.0001; RR females: 3.1 mg/dL range: 1.9–5.9, RR males: 4.8 mg/dL, range: 0.6–9.8; p<0.0001; progressive MS females: 3.3 mg/dL, range: 2.2–6.2, progressive MS males: 4.9 range: 2.7–7.9; p = 0.003). Finally, median urate levels resulted significantly lower in female with RR MS compared with female HC (Bonferroni’s test: p = 0.04) and female NC (Bonferroni’s test: p = 0.03).

In Table 1 the distribution of clinical and MRI characteristics in MS patients across gender is shown. Male MS, as expected, presented, more frequently, a progressive course (chi square: 8.4; p = 0.01) and an EDSS score  $>4$  (chi square: 8; p = 0.002) than female MS, whereas a higher percent of female MS showed an ARR  $>2$  (chi square: 3; p = 0.04) than male MS. When we looked at the relationships between clinical and MRI variables and urate levels in MS we found that serum urate was lower in patients with an ARR  $>2$  (3.3 mg/dL; range: 1.9–9.8), compared to patients

with an ARR  $\leq 2$  (3.9 mg/dL, range: 0.6–8.5; p = 0.05). Serum urate did not differ between in patients with disease duration ( $>25.3$  months: 3.9 mg/dL versus  $\leq 25.3$  months: 3.7 mg/dL; p = 0.1) with EDSS score ( $\leq 4$ : 3.8 mg/dL versus  $>4$ : 3.8 mg/dL) with the presence (3.8 mg/dL) or absence (3.8 mg/dL) of Gd+ MRI lesions and with the immunomodulatory treatment (3.6 mg/dL versus untreated patients: 3.8 mg/dL; p>0.5).

Multivariate regression model (Table 2) revealed that female sex (beta:  $-0.53$ ; p<0.00001) was the most significant determinant of serum urate concentrations in MS patients, after adjustment for age(beta:  $-0.27$ ; p = 0.003), glomerular filtration rate(r:  $-0.003$ ; p = 0.0002), clinical phenotype, disease duration, ARR, disease activity and disability level.

**Discussion**

The most relevant finding of this cross-sectional study is that low serum urate levels are associated with female MS predominantly at the early stage and during the relapsing phase of the disease. In fact we found that serum urate levels were significantly lower in female MS compared to males MS and also to female HC and NC. In addition we demonstrated lower serum urate levels in clinical phenotypes with more prominent inflammation, such as CIS and RR MS, and the lowest levels in RR female MS, which were more frequently associated with higher ARR in comparison with RR male MS. Moreover multivariate analyses clearly showed that female sex was the most significant determinant of serum urate concentrations in MS, after adjustment for demographic, clinical, MRI variables and glomerular filtration rate.

These findings are in agreement with previous studies showing that the low serum urate concentrations in MS are associated with female gender [9,11,19,20] and that more pronounced inflammatory findings, such as more frequent relapses and occurrence of Gd-enhancing MRI lesions are more common in female compared to male MS. [28,35] Although the relatively light difference in median serum levels between female MS and female HC and NC may raise doubt on the clinical significance of our findings they seem to suggest a role of low urate level in the higher susceptibility to develop active RR forms of MS in female sex.

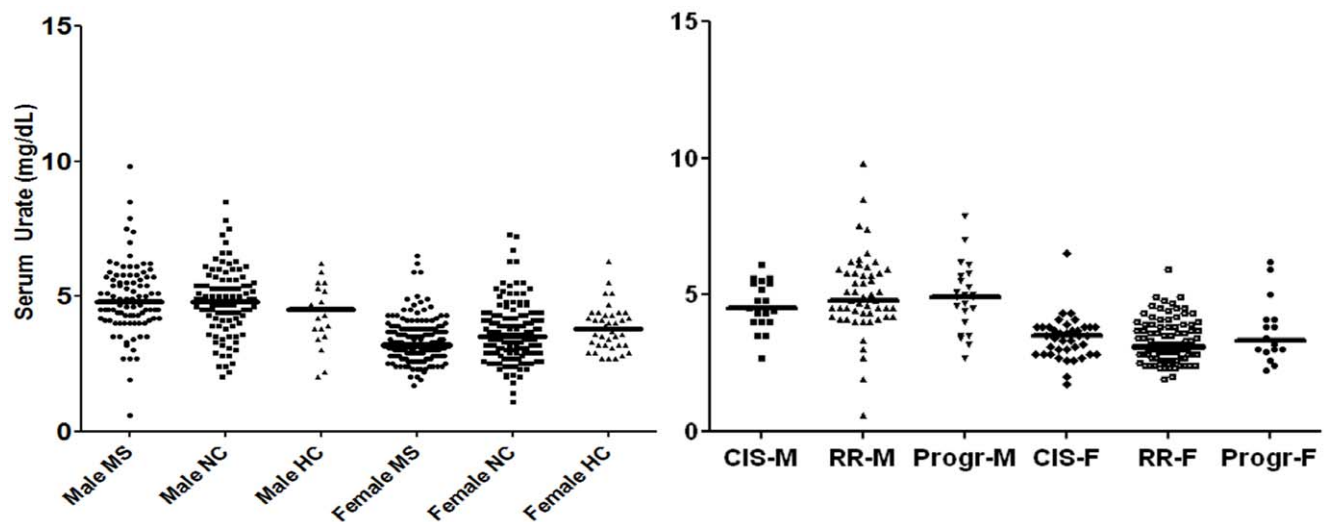

**Figure 1. Serum Urate levels in our study cohort (MS patients, NC and HC), stratified by sex (A) and clinical phenotype(B).** Figure legend. Median serum urate levels were lower in female MS (3.2 mg/dL) compared to female NC (3.5 mg/dL), and female HC (3.8 mg/dL; p = 0.004; Bonferroni’s test: female MS versus female NC p = 0.02; female MS versus female HC p = 0.01). Moreover, serum urate was lower in female with RR MS (3.1 mg/dL; compared to female NC (Bonferroni’s test: p = 0.03) and female HC (Bonferroni’s test: p = 0.04). doi:10.1371/journal.pone.0040608.g001

**Table 1.** Distribution of clinical and MRI characteristics in MS patients across gender.

|                            | Males       | Females                   |
|----------------------------|-------------|---------------------------|
| <b>Clinical subtype</b>    |             |                           |
| CIS MS                     | 19 (20%)    | 39 (26%)                  |
| RR MS                      | 52 (55%)    | 96 (64%)                  |
| Progressive MS             | 23 (25%)    | 16 (10%) <sup>o</sup>     |
| Frequency of ARR >2        | 12/57 (17%) | 33/110(30%) <sup>oo</sup> |
| Frequency of EDSS score >4 | 26 (28%)    | 19 (13%) <sup>ooo</sup>   |

<sup>o</sup>chi square: 8.4; p = 0.01.

<sup>oo</sup>chi square: 3; p = 0.04.

<sup>ooo</sup>chi square: 8; p = 0.002.

doi:10.1371/journal.pone.0040608.t001

A great number of studies evidenced that the neuroinflammation that occurs in several neurologic disorders, including MS, directly induces the production of nitric oxide and superoxide, leading to a vast increase in peroxynitrite formation. [5] Peroxynitrite may play a role in the pathogenesis of MS, both in the demyelination, because of its ability to induce lipid peroxidation of the highly fatty myelin sheaths, [7] and in the axonal damage, by inducing oxidative stress and DNA damage. [5]

Uric acid is a natural anti-oxidant and a peroxynitrite scavenger and accounts for up to 60% of the free radical scavenging activity in human blood. [3] In vitro studies demonstrated that urate levels may reduce the damage to neurons elicited by reactive oxygen species and peroxynitrite and by glutamate excitotoxicity. [3,5]

Several reports previously investigated serum urate levels in patients with MS compared with neurological and healthy controls, with conflicting results. [8–27] Furthermore, most of these studies [12,16,18–22,25,27] were conducted on small cohorts of MS patients and did not control urate levels for significant determinants of serum urate, particularly for renal function. Only one study [15] evaluated serum urate concentrations at the earliest stage of MS (i.e. CIS). A recent meta-analysis. [28] demonstrated that serum urate levels are lower in patients with MS, than in HC, as we found in this paper. However, so far no case-control study assessed serum urate concentrations according to gender.

The correlation between urate levels and clinical and para-clinical disease activity and disability has been also evaluated, with conflicting results [9,11,13,15,19,21,25,26,36] Consistently with the results of the meta-analysis, [28] in our study serum urate did not correlate with disability level and disease duration, but lower urate levels were observed in female patients with higher disease activity (ARR) and in the early phases (CIS) of the MS. Based on these findings the contribute of inadequate protection against reactive oxygen and peroxynitrite by urate to the axonal loss and the clinical progression of the disease still remains uncertain, but a role of low urate in favouring neuroinflammation and demyelination that occur early in MS and mainly in females may be hypothesized.

Several limitations of our study however deserve discussion. First, the study has a cross-sectional design that prevents us to assess a temporal relationship between the decrease in serum urate levels and MS course; the change in urate concentrations might not be a primary event, but rather represents an epiphenomenon related to its scavenging activity; however the trend for lower urate levels observed in patients with CIS seems

**Table 2.** Multivariate linear regression analysis.

| Variable                                                  | beta  | p        |
|-----------------------------------------------------------|-------|----------|
| Age                                                       | -0.11 | 0.1      |
| Female sex                                                | -0.53 | <0.00001 |
| Glomerular filtration rate                                | -0.27 | 0.003    |
| Disease duration                                          | -0.03 | 0.9      |
| <b>Disease course</b>                                     |       |          |
| RR versus CIS                                             | 0.001 | 0.9      |
| Progressive versus CIS                                    | 0.14  | 0.2      |
| <b>Disability level (EDSS score ≥4 versus EDSS &lt;4)</b> |       |          |
|                                                           | -0.03 | 0.7      |
| <b>Disease activity</b>                                   |       |          |
| Annual relapse rate >2                                    | -0.06 | 0.5      |

doi:10.1371/journal.pone.0040608.t002

to indicate that the decrease in urate concentrations is present since the earliest stage of the disease. Second, this is a clinical based study from a tertiary center and therefore our case-series may not be completely representative of the whole MS population, since cases with a more severe phenotype less likely come to the attention of a tertiary center. Third, we did not use sophisticated analytical methods able to assess other purine compounds such as hypoxanthine, xanthine that could add further useful information about cell energy imbalance, mitochondrial dysfunction and ATP consumption.

Finally, we did not collect information on study participants' body mass index. Urate levels positively correlate with age, sex, renal function and body mass index, and malnutrition is a major determinant of lower serum urate concentrations. [37] However, a causal correlation between the decrease in uric acid levels observed in our study and malnutrition is unlikely, as we observed the decrease in urate levels in patients with CIS and early RR, whereas malnutrition due to impaired swallowing may occur in MS only in the latest stage of the disease.

In conclusion, our findings favours the view that low urate levels could be of significance in predominantly inflammatory phases of MS even at the early stage and mainly in females. Future longitudinal studies with a prospective design and using more sophisticated analytical methods should be conducted on large cohorts to clarify the effective role of urate in MS, and to evaluate if the change in urate levels may be used to predict the development of the progressive phase of MS.

**Acknowledgments**

**Disclaimer**

The Authors received patient consent forms; the Methods section includes a statement that an IRB or regional review board has approved the study.

As corresponding author I take full responsibility for the data, the analyses and interpretation, and the conduct of the research; I have full access to all of the data; and I have the right to publish any and all data separate and apart from any sponsor. public responsibility for appropriate portions of its content.

The manuscript (or any part of it) has not been published previously or is not under consideration for publication elsewhere. All authors and contributors have agreed to conditions noted on the Authorship Agreement Form.

## Author Contributions

Conceived and designed the experiments: MT PL SZ. Performed the experiments: PI VD MD DP EL CT. Analyzed the data: PI SZ MT.

Contributed reagents/materials/analysis tools: MT PI. Wrote the paper: MT SZ.

## References

- Noseworthy JH, Lucchinetti C, Rodriguez M, Weinshenker BG (2000) Multiple Sclerosis. *N Engl J Med* 343: 938–952.
- Oda M, Satta Y, Takenaka O, Takahata N (2002) Loss of urate oxidase activity in hominoids and its evolutionary implications. *Mol Biol Evol* 19: 640–653.
- Ames BN, Cathcart R, Schwiers E, Hochstein P (1988) Uric acid provides an antioxidant defense in humans against oxidant- and radical-caused aging and cancer: a hypothesis. *Proc Natl Acad Sci USA* 78: 6858–6862.
- Beal MF (2005) Mitochondria take center stage in aging and neurodegeneration. *Ann Neurol* 58: 495–505.
- Kutzing MK, Firestein BL (2008) Altered uric acid levels and disease states. *J Pharmacol Exp Ther* 324: 1–7.
- Moore GR (2010) Current concepts in the neuropathology and pathogenesis of multiple sclerosis. *Can J Neurol Sci* 37 Suppl 2: S5–15.
- van der Veen RC, Roberts LJ (1999) Contrasting roles for nitric oxide and peroxynitrite in the peroxidation of myelin lipids. *J Neuroimmunol* 95: 1–7.
- Hooper DC, Spitsin S, Kean RB, Champion JM, Dickson GM, et al. (1998) Uric acid, a natural scavenger of peroxynitrite, in experimental allergic encephalomyelitis and multiple sclerosis. *Proc Natl Acad Sci U S A* 95: 675–680.
- Drluović J, Dujmović I, Stojšavljević N, Mesáros S, Andjelković S, et al. (2001) Uric acid levels in sera from patients with multiple sclerosis. *J Neurol* 248: 121–126.
- Spitsin S, Hooper DC, Mikhcheva T, Koprowski H (2001) Uric acid levels in patients with multiple sclerosis: analysis in mono- and dizygotic twins. *Mult Scler* 7: 165–166.
- Sotgiu S, Pugliatti M, Sanna A, Sotgiu A, Fois ML, et al. (2002) Serum uric acid and multiple sclerosis. *Neurol Sci* 23: 183–188.
- Dujmović I, Pekmezović T, Obrenović R, Nikolić A, Spasić M, et al. (2009) Cerebrospinal fluid and serum uric acid levels in patients with multiple sclerosis. *Clin Chem Lab Med* 47: 848–853.
- Peng F, Zhang B, Zhong X, Li J, Xu G, et al. (2008) Serum uric acid levels of patients with multiple sclerosis and other neurological diseases. *Mult Scler* 14: 188–196.
- Zamani A, Rezaei A, Khaeir F, Hooper DC (2008) Serum and cerebrospinal fluid uric acid levels in multiple sclerosis patients. *Clin Neurol Neurosurg* 110: 642–643.
- Rentzos M, Nikolaou C, Anagnostouli M, Rombos A, Tsakanikas K, et al. (2006) Serum uric acid and multiple sclerosis. *Clin Neurol Neurosurg* 108: 527–531.
- Amorini AM, Petzold A, Tavazzi B, Eikelenboom J, Keir G, et al. (2009) Increase of uric acid and purine compounds in biological fluids of multiple sclerosis patients. *Clin Biochem* 42: 1001–1006.
- Tavazzi B, Batocchi AP, Amorini AM, Nociti V, D'Urso S, et al. (2011) Serum metabolic profile in multiple sclerosis patients. *Mult Scler Int* 2011: 167156.
- Salemi G, Gueli MC, Vitale F, Battaglieri F, Guglielmini E, et al. (2010) Blood lipids, homocysteine, stress factors, and vitamins in clinically stable multiple sclerosis patients. *Lipids Health Dis* 9: 19.
- Toncev G, Milicic B, Toncev S, Samardzic G (2002) Serum uric acid levels in multiple sclerosis patients correlate with activity of disease and blood-brain barrier dysfunction. *Eur J Neurol* 9: 221–226.
- Fuhua P, Xuhui D, Zhiyang Z, Ying J, Yu Y, et al. (2012) Antioxidant status of bilirubin and uric acid in patients with myasthenia gravis. *Neuroimmunomodulation* 19: 43–49.
- Karg E, Klivényi P, Németh I, Bencsik K, Pintér S, et al. (1999) Nonenzymatic antioxidants of blood in multiple sclerosis. *J Neurol* 246: 533–539.
- Becker BF, Kastenbauer S, Ködel U, Kiesel D, Pfister HW (2004) Urate oxidation in CSF and blood of patients with inflammatory disorders of the nervous system. *Nucleosides Nucleotides Nucleic Acids* 23: 1201–1204.
- Miller E, Walczak A, Saluk J, Ponczek MB, Majsterek I (2012) Oxidative modification of patient's plasma proteins and its role in pathogenesis of multiple sclerosis. *ClinBiochem* 45: 26–30.
- Mostert JP, Ramsaransing GS, Heersema DJ, Heerings M, Wilczak N, et al. (2005) Serum uric acid levels and leukocyte nitric oxide production in multiple sclerosis patients outside relapses. *J Neurol Sci* 231: 41–44.
- Ramsaransing GS, Heersema DJ, De Keyser J (2005) Serum uric acid, dehydroepiandrosterone sulphate, and apolipoprotein E genotype in benign vs. progressive multiple sclerosis. *Eur J Neurol* 12: 514–518.
- Massa J, O'Reilly E, Munger KL, Delorenze GN, Ascherio A (2009) Serum uric acid and risk of multiple sclerosis. *J Neurol* 256: 1643–1648.
- Kanabrocki EL, Ryan MD, Hermida RC, Ayala DE, McCormick JB, et al. (2008) Uric acid and renal function in multiple sclerosis. *Clin Ter* 159: 35–40.
- Liu B, Shen Y, Xiao K, Tang Y, Cen L, et al. (2012) Serum uric acid levels in patients with multiple sclerosis: a meta-analysis. *Neurol Res* 34: 163–171.
- Gonsette RE, Sindic C, D'hooghe MB, De Deyn PP, Medaer R, et al. (2010) Boosting endogenous neuroprotection in multiple sclerosis: the Association of Inosine and Interferon beta in relapsing- remitting Multiple Sclerosis (ASIMS) trial. *Mult Scler* 16: 455–462.
- Polman CH, Reingold SC, Edan G, Filippi M, Hartung HP, et al. (2005) Diagnostic criteria for multiple sclerosis: 2005 revisions to the “McDonald Criteria”. *Ann Neurol* 58: 840–846.
- Polman CH, Reingold SC, Banwell B, Clanet M, Cohen JA, et al. (2011) Diagnostic criteria for multiple sclerosis: 2010 revisions to the McDonald criteria. *Ann Neurol* 69: 292–302.
- Bos MJ, Koudstaal PJ, Hofman A, Witteman JC, Breteler MM (2006) Uric acid is a risk factor for myocardial infarction and stroke: the Rotterdam study. *Stroke* 37: 1503–1507.
- Levey AS, Coresh J, Greene T, Marsh J, Stevens LA, et al. (2007) Expressing the Modification of Diet in Renal Disease Study equation for estimating glomerular filtration rate with standardized serum creatinine values. *Clin Chem* 53: 766–772.
- Kurtzke JF (1983) Rating neurologic impairment in multiple sclerosis: an expanded disability status scale (EDSS). *Neurology* 33: 1444–1452.
- Greer JM, McCombe PA (2011) Role of gender in multiple sclerosis: Clinical effects and potential molecular mechanisms. *J Neuroimmunology* 234: 7–18.
- Guerrero AL, Martín-Polo J, Laherrán E, Gutiérrez F, Iglesias F, et al. (2008) Variation of serum uric acid levels in multiple sclerosis during relapses and immunomodulatory treatment. *Eur J Neurol* 15: 394–397.
- Gasteyger C, Suter M, Calmes JM, Gaillard RC, Giusti V (2006) Changes in body composition, metabolic profile and nutritional status 24 months after gastric banding. *Obes Surg* 16: 243–250.
